# Supplementary material for: Two-dimensional additive diethylammonium iodide promoting crystal growth for efficient and stable perovskite solar cells
Source: Royal Society of Chemistry journal article supplement (doi:10.1039/c9ra01186b), 2019-01-01
Supplement: c9ra01186b1.pdf [file c9ra01186b1.pdf]

Supplementary Information

**Two-dimension additive diethylammonium iodide promoting crystal growth for  
efficient and stable perovskite solar cells**

Xin Huang, Qihong Cui\*, WentaoBi, Ling Li, Pengcheng Jia, Yanbing Hou, Yufeng  
Hu, Zhidong Lou, FengTeng\*

Key Laboratory of Luminescence and Optical Information, Ministry of Education,  
Beijing Jiaotong University, Beijing 100044, China

E-mail address: qhcui@bjtu.edu.cn (Qihong Cui), fteng@bjtu.edu.cn (Feng Teng).

Figure S1. Top view of SEM images of perovskite films (a) with 10% PEAI content, (b) with 10% BAI content. This figure shows that the films doped with PEAI or BAI present small grains less than 100 nm, and even smaller than the MAPbI<sub>3</sub> film. The results indicate PEAI or DAI could not induce the crystal grain growth of 3D film.

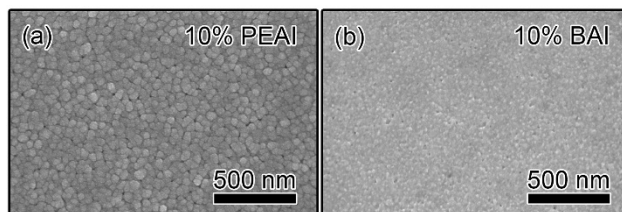

Figure S2. XRD patterns of the perovskite films without and with 7%, 10% and 15% DA contents. The inset is the XRD pattern of DA<sub>2</sub>PbI<sub>4</sub>. Compared with the XRD patterns of 2D perovskite DA<sub>2</sub>PbI<sub>4</sub> films, the peaks around 7.5° in the XRD patterns of DA mixed films mainly belong to DA<sub>2</sub>PbI<sub>4</sub>.

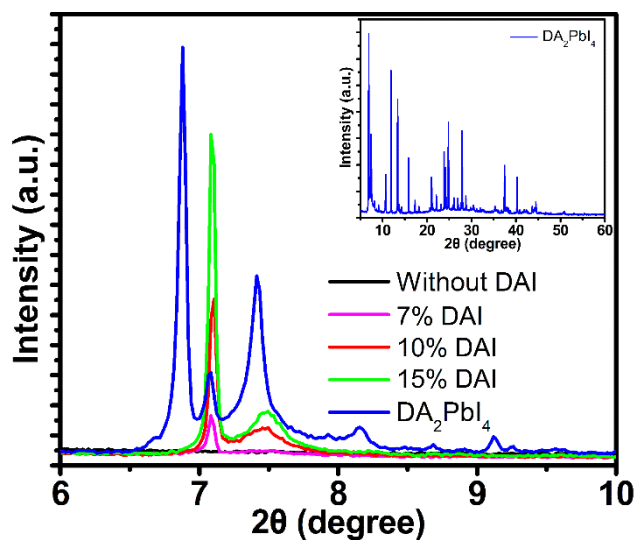

Figure S3. *J-V* characteristics of the perovskite devices without and with 7%, 10% and 15% DAI contents. The measurements were conducted during reverse scanning under one sun illumination at 100 mW cm<sup>-2</sup>. The devices based on the perovskite film with 10% DAI content exhibits the best performance.

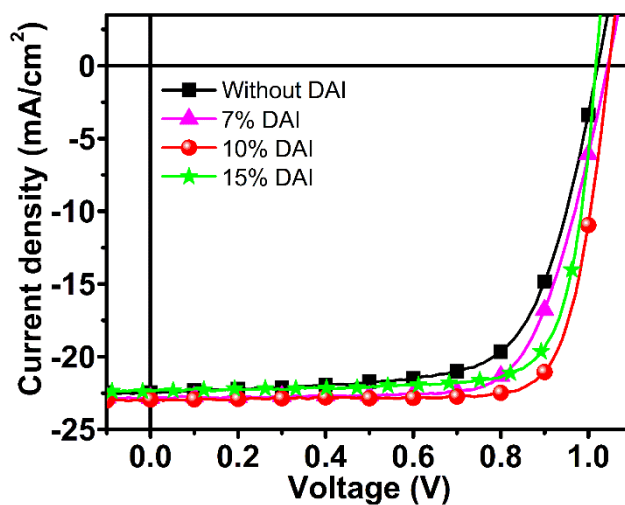

Table S1. Performance parameters obtained from the *J-V* characteristics of the perovskite devices without and with 7%, 10% and 15% DAI contents.

| DA content (%) | $J_{sc}$ (mAcm <sup>-2</sup> ) | $V_{oc}$ (V) | FF (%) | PCE (%) |
|----------------|--------------------------------|--------------|--------|---------|
| 0              | 22.47                          | 1.02         | 68.60  | 15.73   |
| 7              | 22.83                          | 1.04         | 72.09  | 17.12   |
| 10             | 22.95                          | 1.05         | 79.04  | 19.05   |
| 15             | 22.33                          | 1.02         | 77.91  | 17.72   |

Figure S4. The performance of best devices without and with 10% DAI content films under reverse scan (1.2V--0.2 V) and forward scan (-0.2V-1.2 V). The hysteresis of the  $(\text{DA}_2\text{PbI}_4)_{0.05}\text{MAPbI}_3$  perovskite solar cell is slightly reduced.

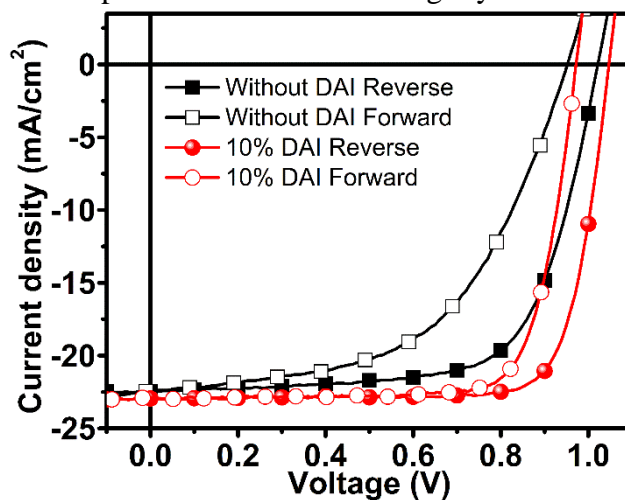

Table S2. Performance parameters of the device without and with 10% DA contents under reverse scan (1.2V-0.2 V) and forward scan (-0.2V-1.2 V).

| DA content | Scan direction | $J_{sc}$ (mA cm <sup>-2</sup> ) | $V_{oc}$ (V) | FF (%) | PCE (%) |
|------------|----------------|---------------------------------|--------------|--------|---------|
| Without    | Reverse        | 22.47                           | 1.02         | 68.60  | 15.73   |
|            | Forward        | 22.44                           | 0.95         | 54.56  | 11.63   |
| 10% DAI    | Reverse        | 22.95                           | 1.05         | 79.04  | 19.05   |
|            | Forward        | 22.92                           | 0.97         | 77.73  | 17.26   |

Figure S5. The long-term stability of normalized PCE of the fabricated devices without and with 10% DA content. The PCE of the  $(\text{DA}_2\text{PbI}_4)_{0.05}\text{MAPbI}_3$  device shows better stability than the  $\text{MAPbI}_3$  device.

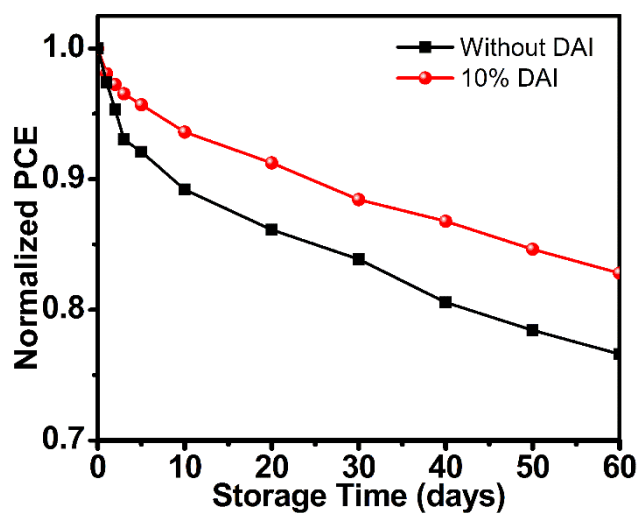

Table S3. Fitted parameters of the TRPL curves of ITO/perovskite films.

| DA content | B <sub>1</sub><br>(%) | τ <sub>1</sub><br>(ns) | B <sub>2</sub><br>(%) | τ <sub>2</sub><br>(ns) | τ <sub>average</sub><br>(ns) |
|------------|-----------------------|------------------------|-----------------------|------------------------|------------------------------|
| Without    | 41.76                 | 8.59                   | 58.24                 | 66.24                  | 61.34                        |
| 7%         | 51.90                 | 38.02                  | 48.10                 | 88.66                  | 72.65                        |
| 10%        | 42.40                 | 34.59                  | 57.60                 | 103.04                 | 89.48                        |
| 15%        | 47.76                 | 4.88                   | 52.24                 | 39.16                  | 35.65                        |
